# Supplementary material for: Application of Ultrasound Treatments in the Processing and Production of High-Quality and Safe-to-Drink Kiwi Juice
Source: MDPI journal article supplement (doi:10.3390/foods13020328), 2024-01-20
Supplement: s1 [file s1]

**Table S1.** Chroma and hue angle parameters of thermally treated and thermosonicated kiwi juice

| Treatment  | Color parameters              |                                 |
|------------|-------------------------------|---------------------------------|
|            | Chroma                        | Hue angle                       |
| Fresh      | $6.58 \pm 0.53$ <sup>ab</sup> | $112.56 \pm 1.30$ <sup>ab</sup> |
| 45 °C      | $6.56 \pm 0.69$ <sup>ab</sup> | $109.39 \pm 3.24$ <sup>a</sup>  |
| 50 °C      | $6.80 \pm 1.02$ <sup>ab</sup> | $112.11 \pm 1.70$ <sup>ab</sup> |
| 55 °C      | $8.05 \pm 1.51$ <sup>b</sup>  | $116.04 \pm 0.56$ <sup>b</sup>  |
| 45 °C + US | $6.38 \pm 1.65$ <sup>ab</sup> | $113.90 \pm 3.02$ <sup>ab</sup> |
| 50 °C + US | $5.88 \pm 1.51$ <sup>a</sup>  | $114.69 \pm 4.24$ <sup>b</sup>  |
| 55 °C + US | $4.93 \pm 0.86$ <sup>a</sup>  | $117.05 \pm 3.68$ <sup>b</sup>  |

Values are mean  $\pm$  confidence intervals at 95% of the three replicates for each treatment. For a given treatment, values with different letters differ significantly ( $p < 0.05$ ).
